# Supplementary material for: Growth of well-defined ZnO microparticles by hydroxide ion hydrolysis of zinc saltsElectronic supplementary information (ESI) available: SEM images of initial precipitate and of particles formed by Method A. See http://www.rsc.org/suppdata/jm/b2/b211723c/
Source: Royal Society of Chemistry journal article supplement (doi:10.1039/b211723c), 2003-03-20
Supplement: b211723cfii.doc [file b211723cfii.doc]

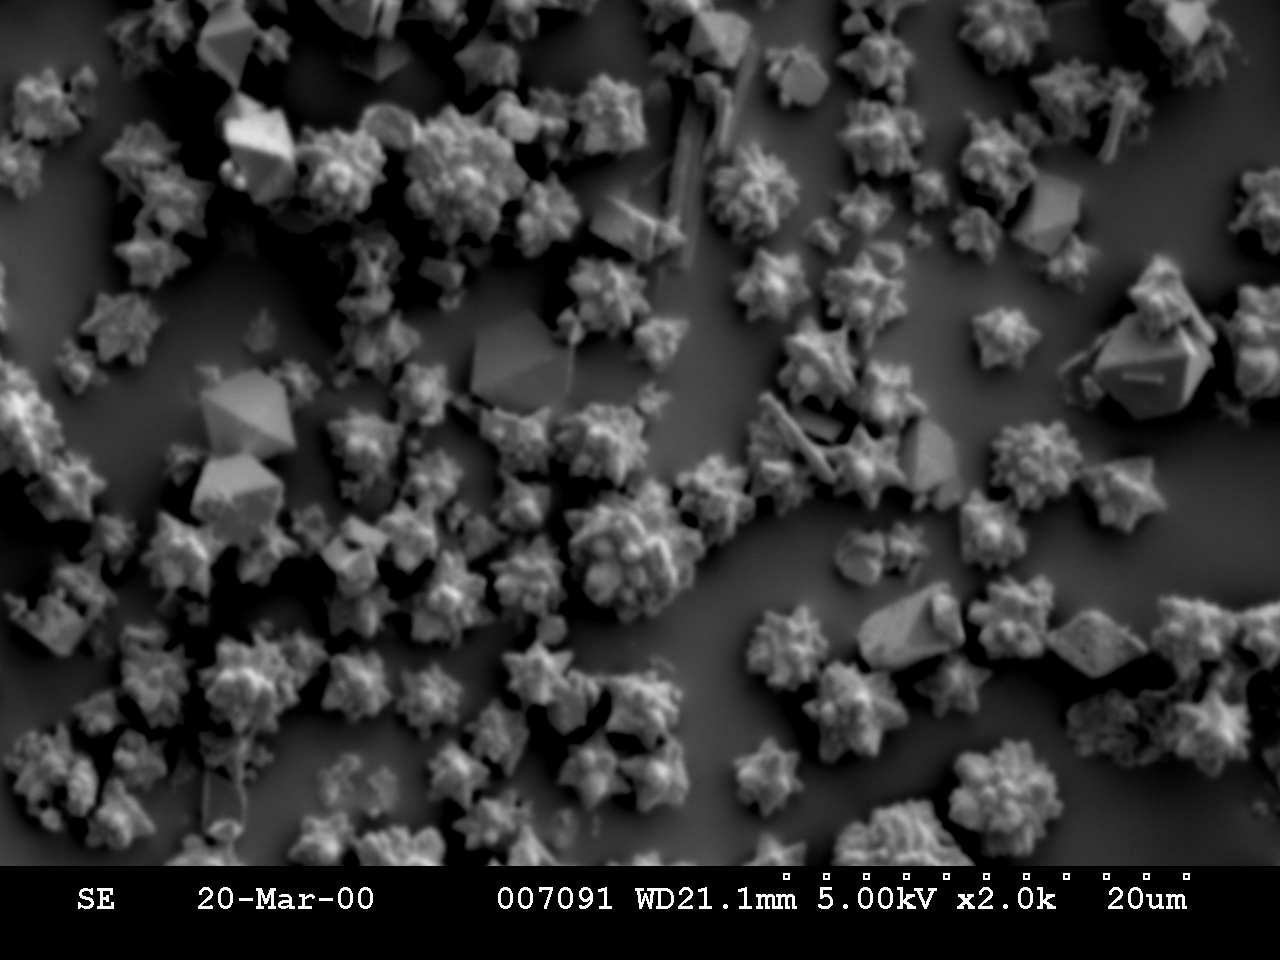

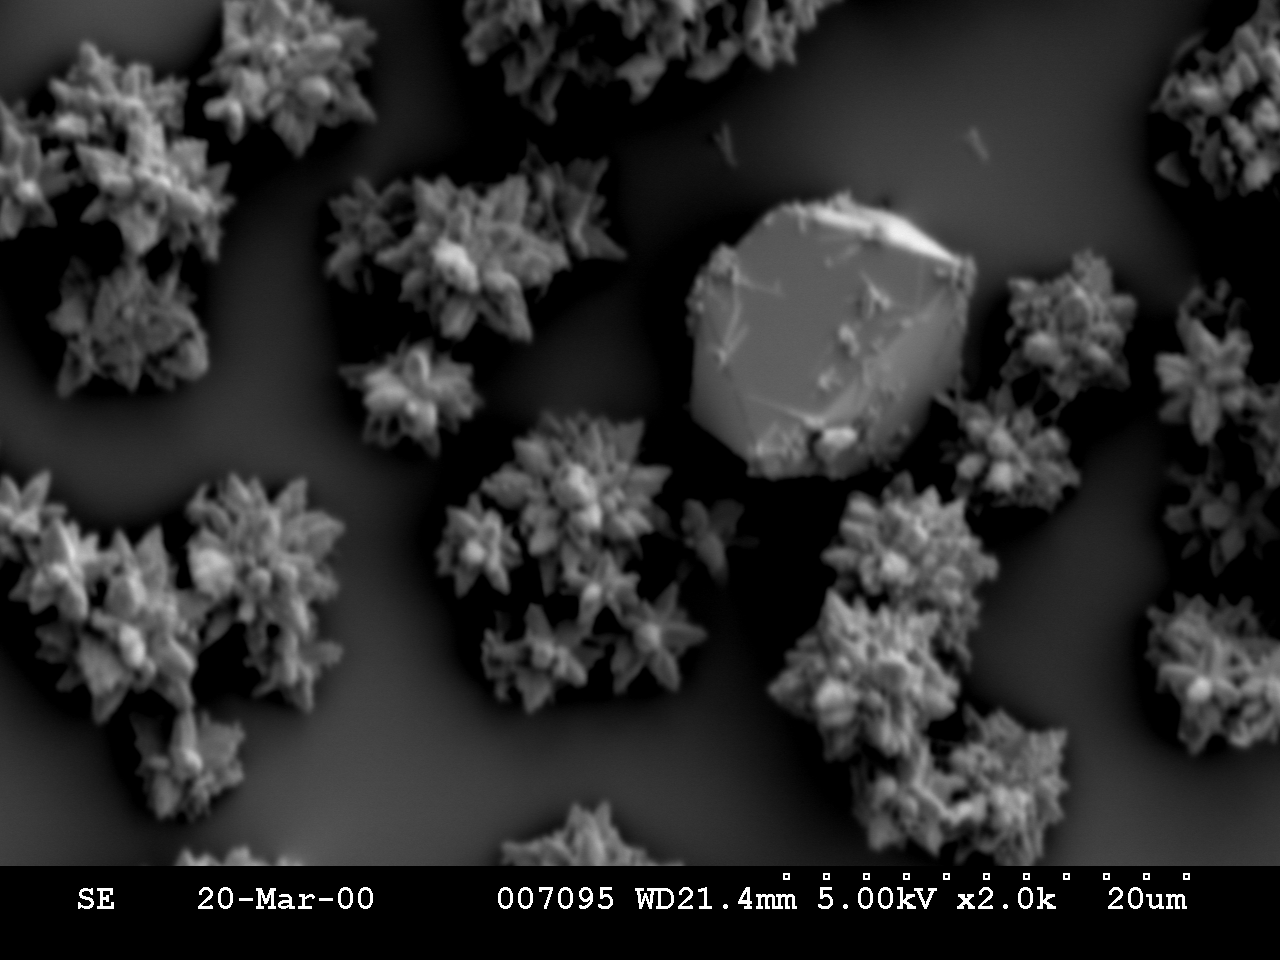


20 m

20 m

(A)

(B)

(D)


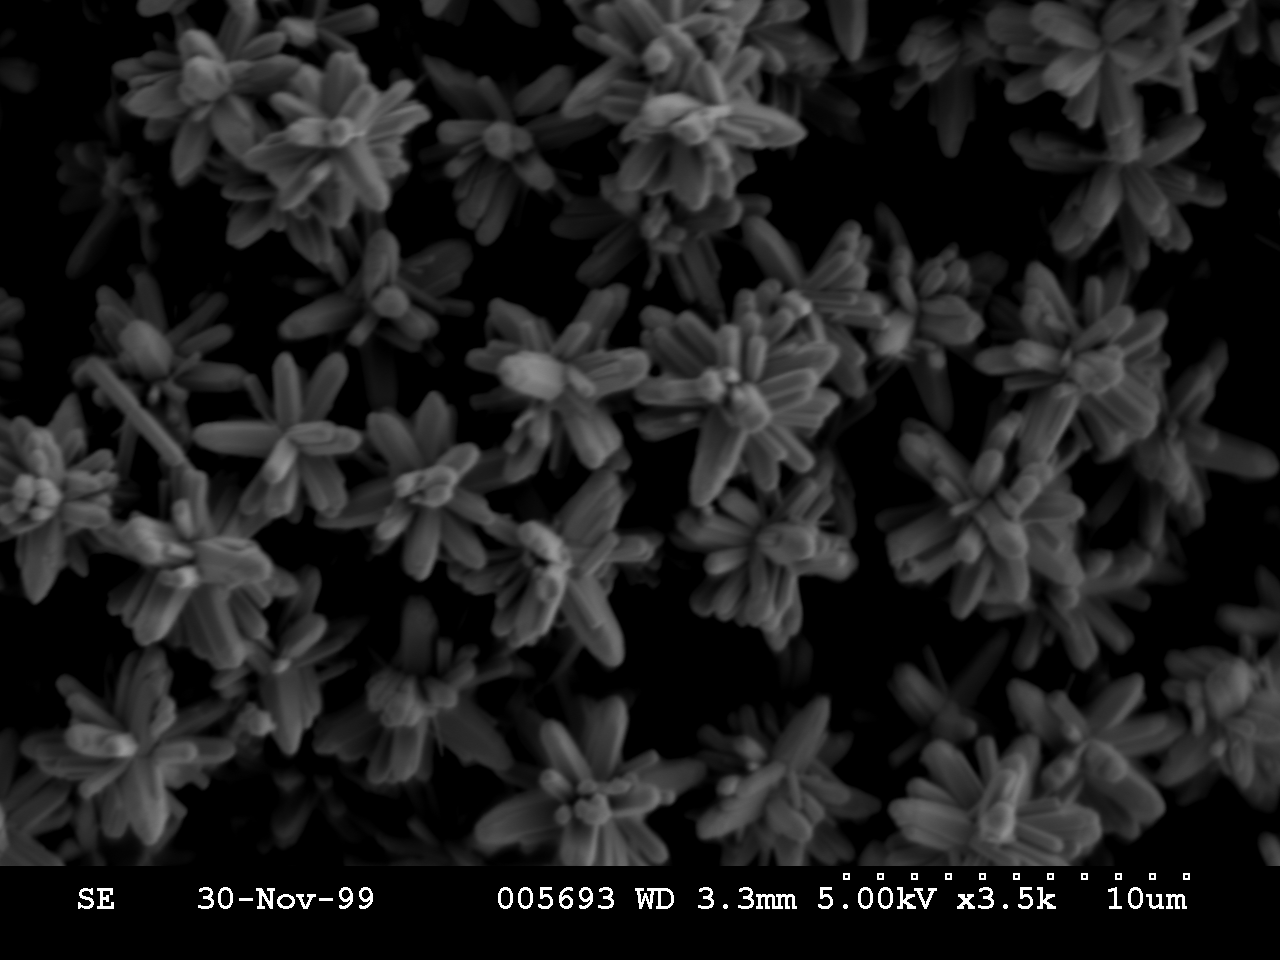

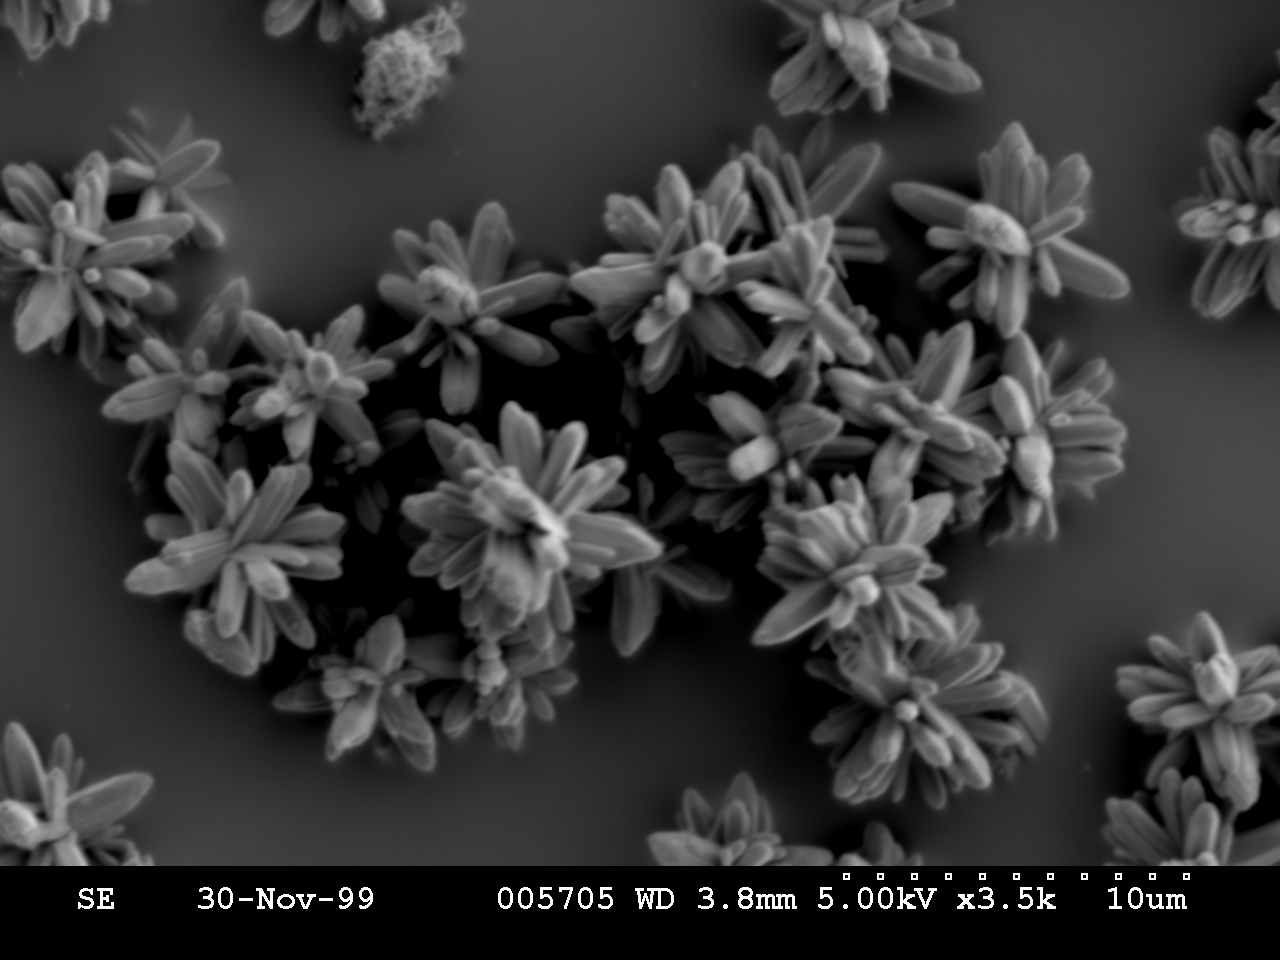


10 m

10 m

(C)

(D)

**SEI Figure II**

SEM of ZnO star-like particles prepared by ageing Zn(NO3)2.6H2O (0.04 M) with NaOH (1 M).

SEM of particles after (A) precipitation, (B) 10 minutes, (C) 30 minutes and (D) 120 minutes after precipitation.

(F)

The few large particles visible up to 10 minutes after precipitation, were identified by Raman microscopy as Zn(OH)2. However these particles were a minor product and were completely absent when the temperature of the reaction mixture increased above 70 C.

(C)
