# Supplementary figures and images for: Growth of well-defined ZnO microparticles by hydroxide ion hydrolysis of zinc saltsElectronic supplementary information (ESI) available: SEM images of initial precipitate and of particles formed by Method A. See http://www.rsc.org/suppdata/jm/b2/b211723c/
Source: Royal Society of Chemistry journal article supplement (doi:10.1039/b211723c), 2003-03-20

*
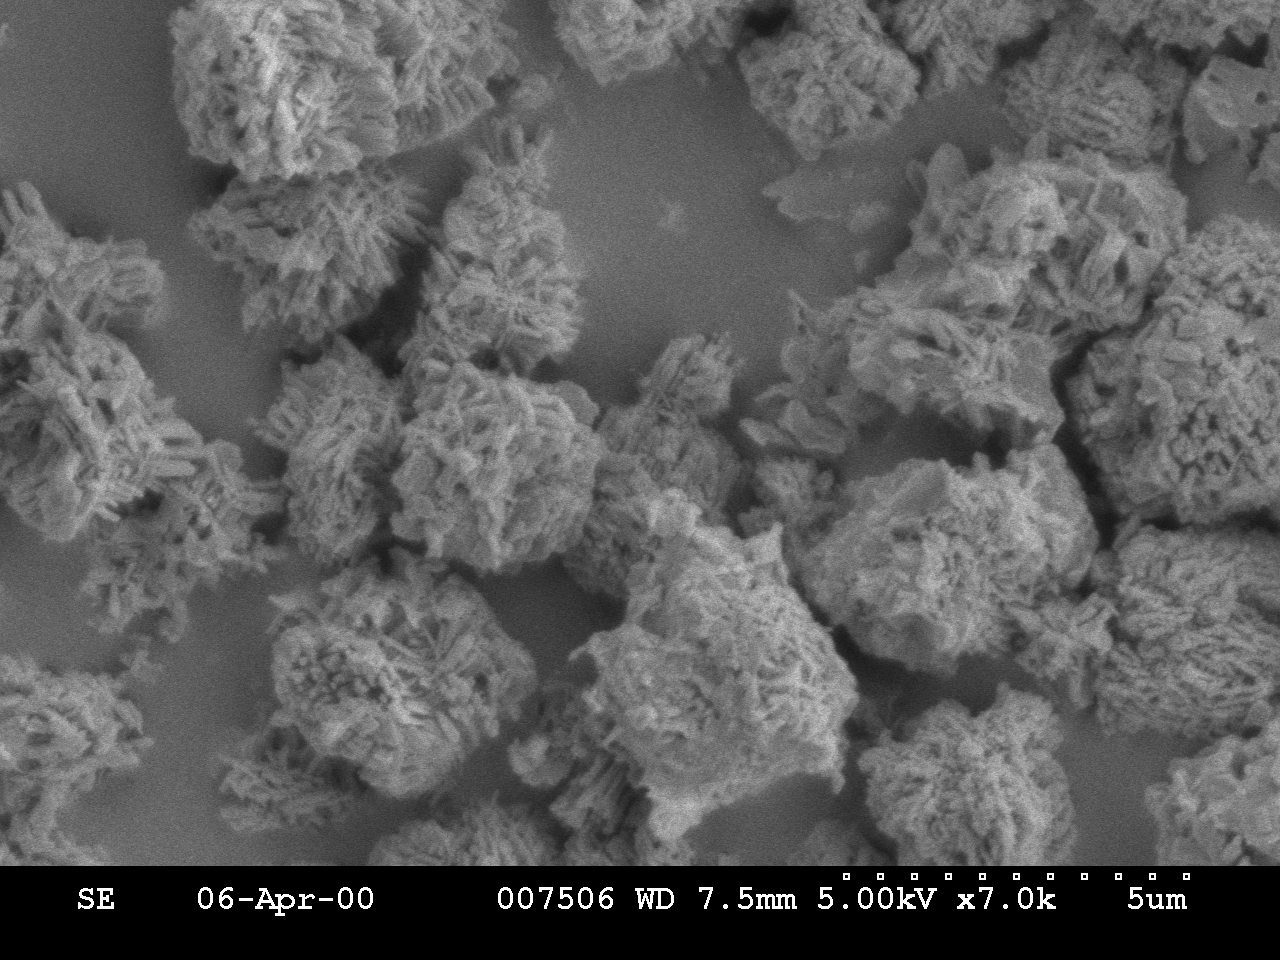
*

5 m

# Figure I

SEM of initial precipitate formed when NaOH (1 M) is added to Zn(NO3)2.6H2O (0.04 M).

Supplement: b211723cfi.doc [file b211723cfi.doc]
